# Supplementary material
Source: publisher figshare collection journal article supplement (https://aacr.figshare.com/articles/dataset/_/22353768)
Supplement: Supplementary file 1 [file 39778293]

Figure S4. Changes in T cell subsets at the time of the best responses
